# Supplementary material for: Reversible lewisite adsorption/desorption on the transition metal doped graphene: First-principle calculations
Source: Research Square preprint supplement (doi:10.21203/rs.3.rs-2471073/v1), 2023-01-20
Supplement: Supplementary file 1 [file c9ef5c54d3459d33eba08efb.docx]

Supporting Information


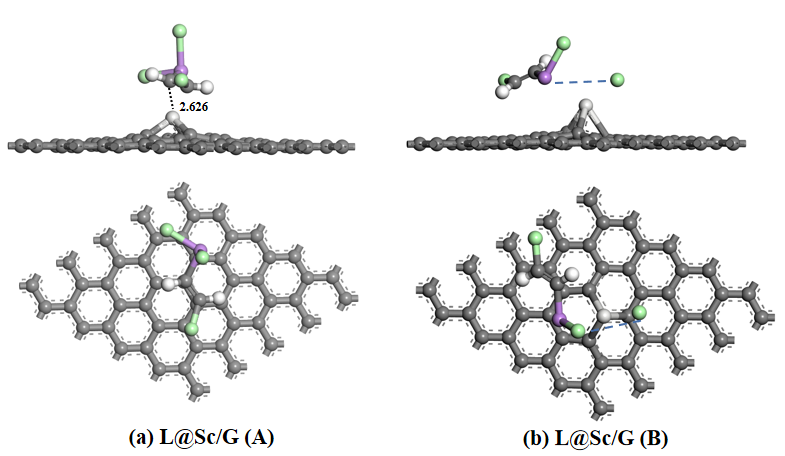

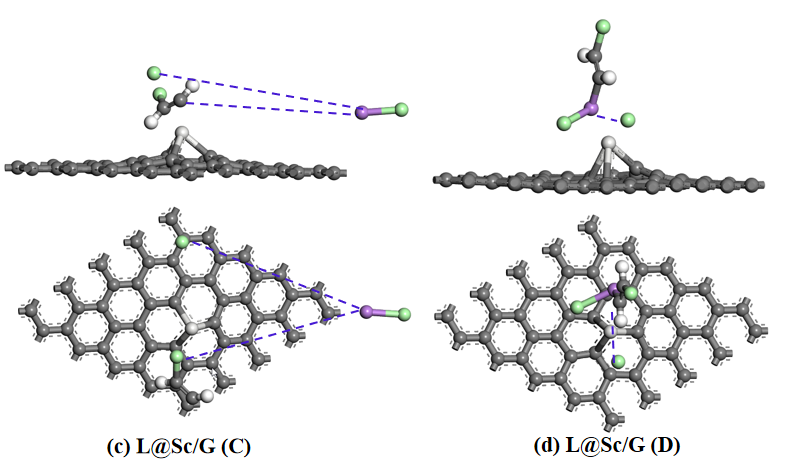


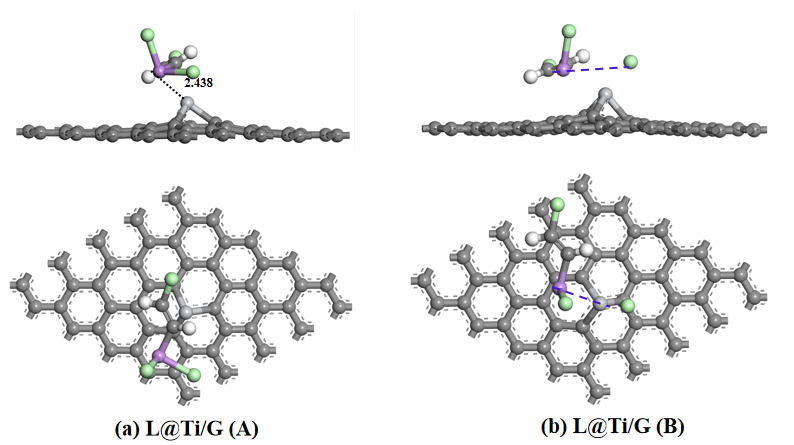

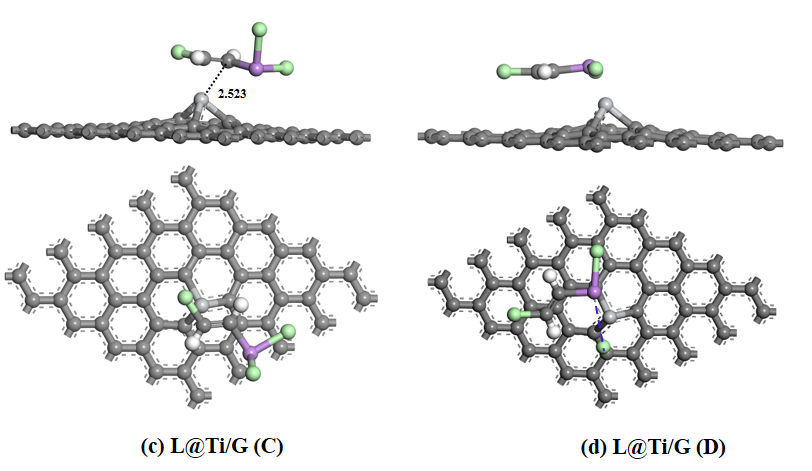

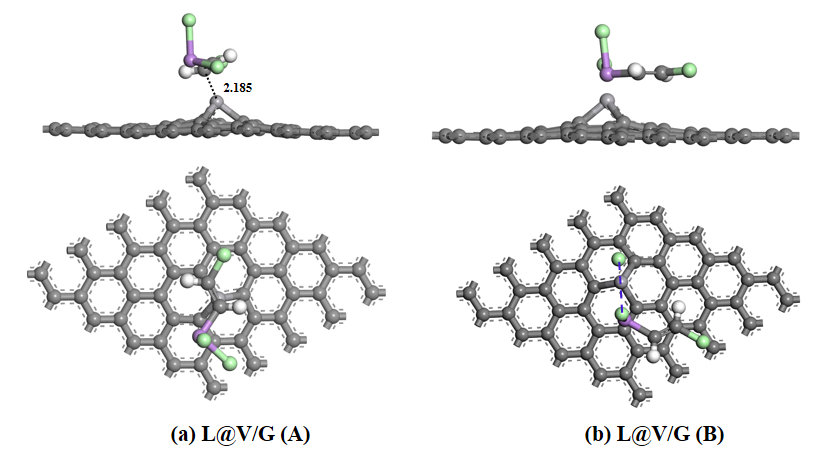

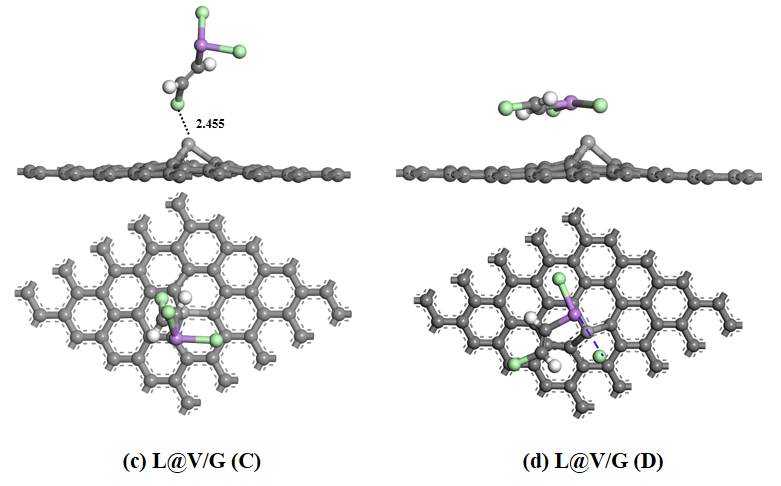

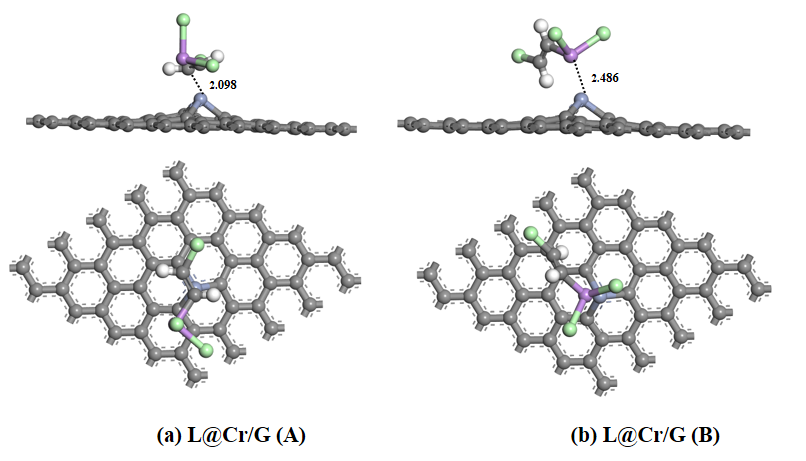

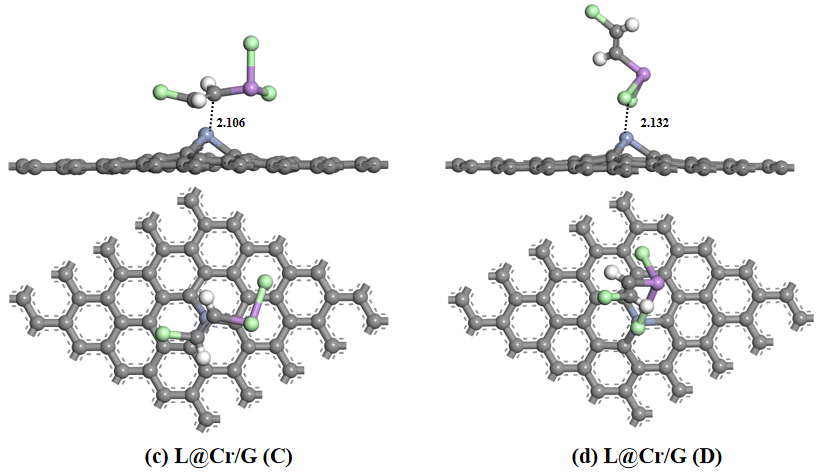

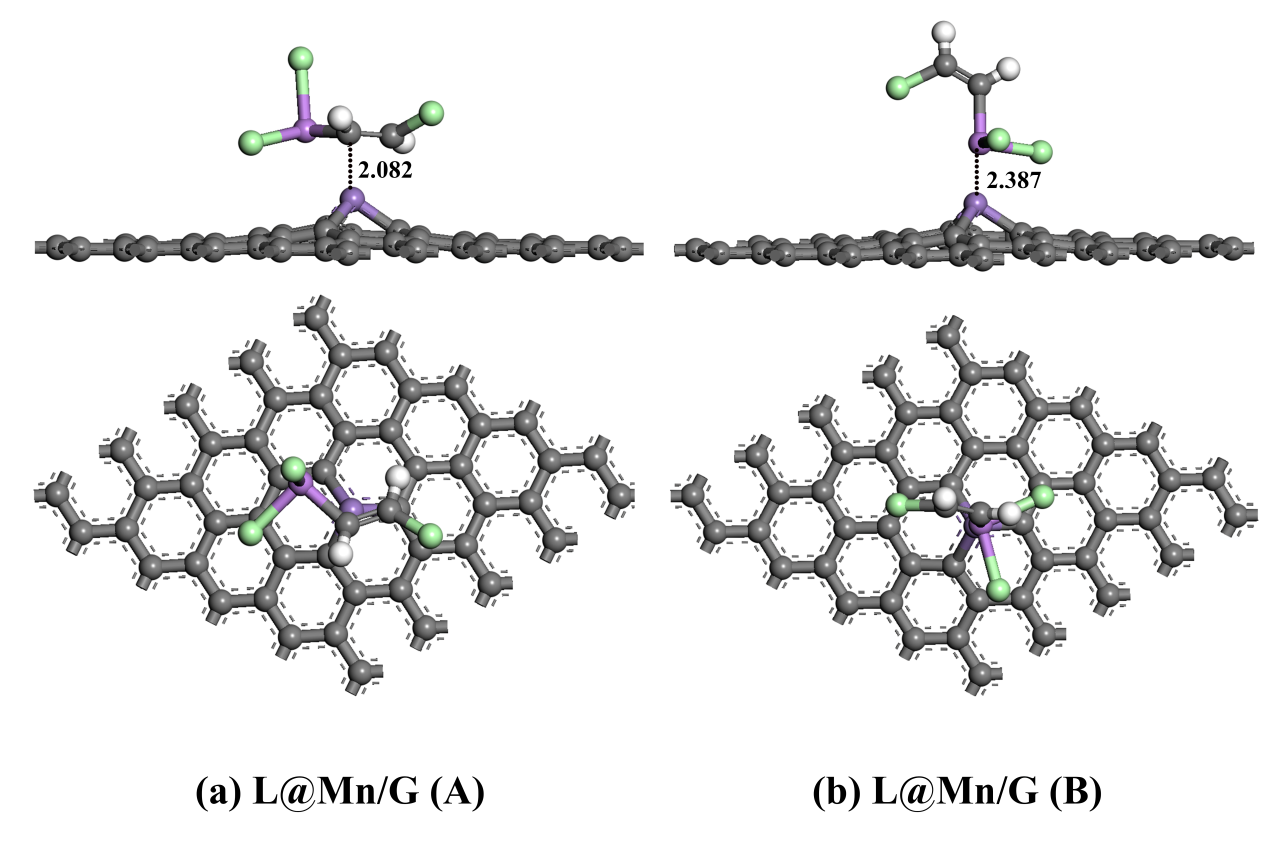

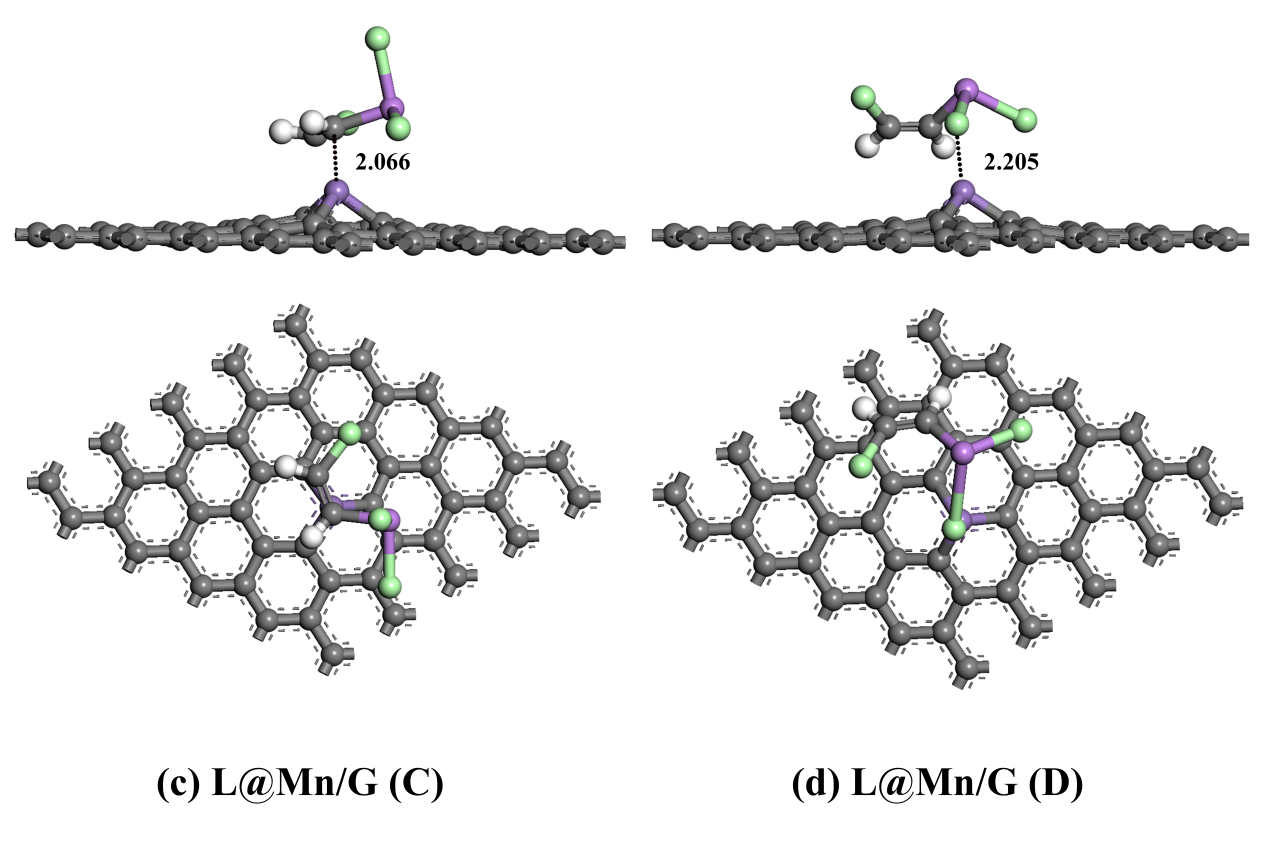

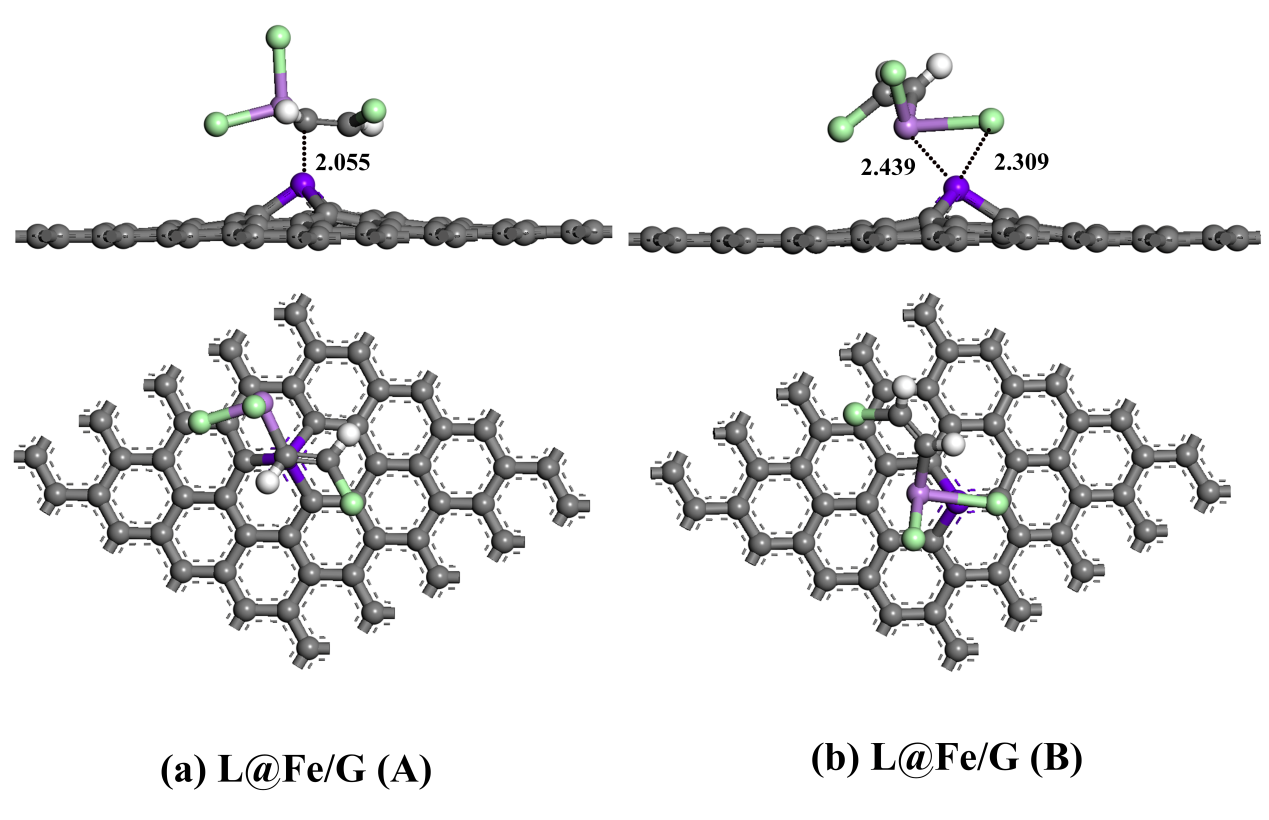


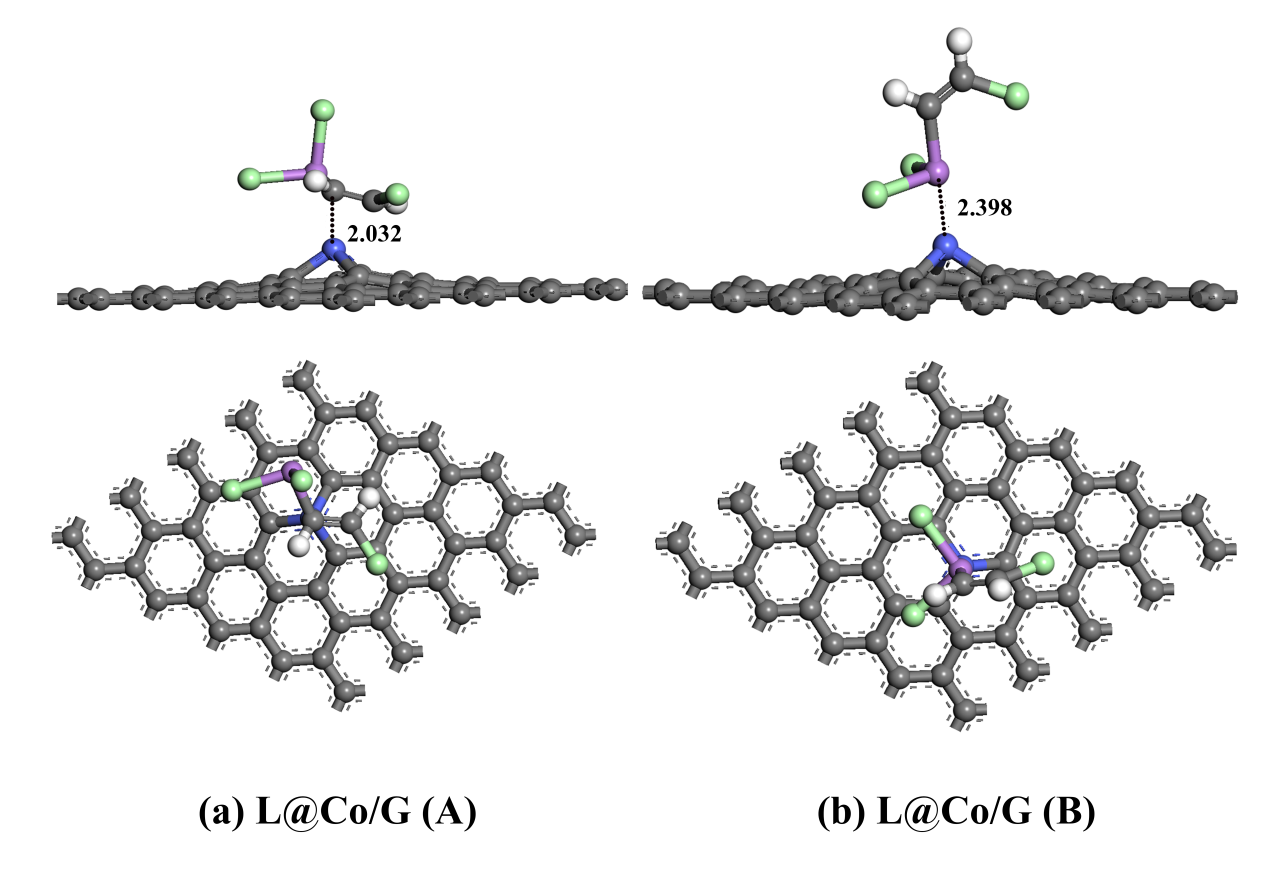


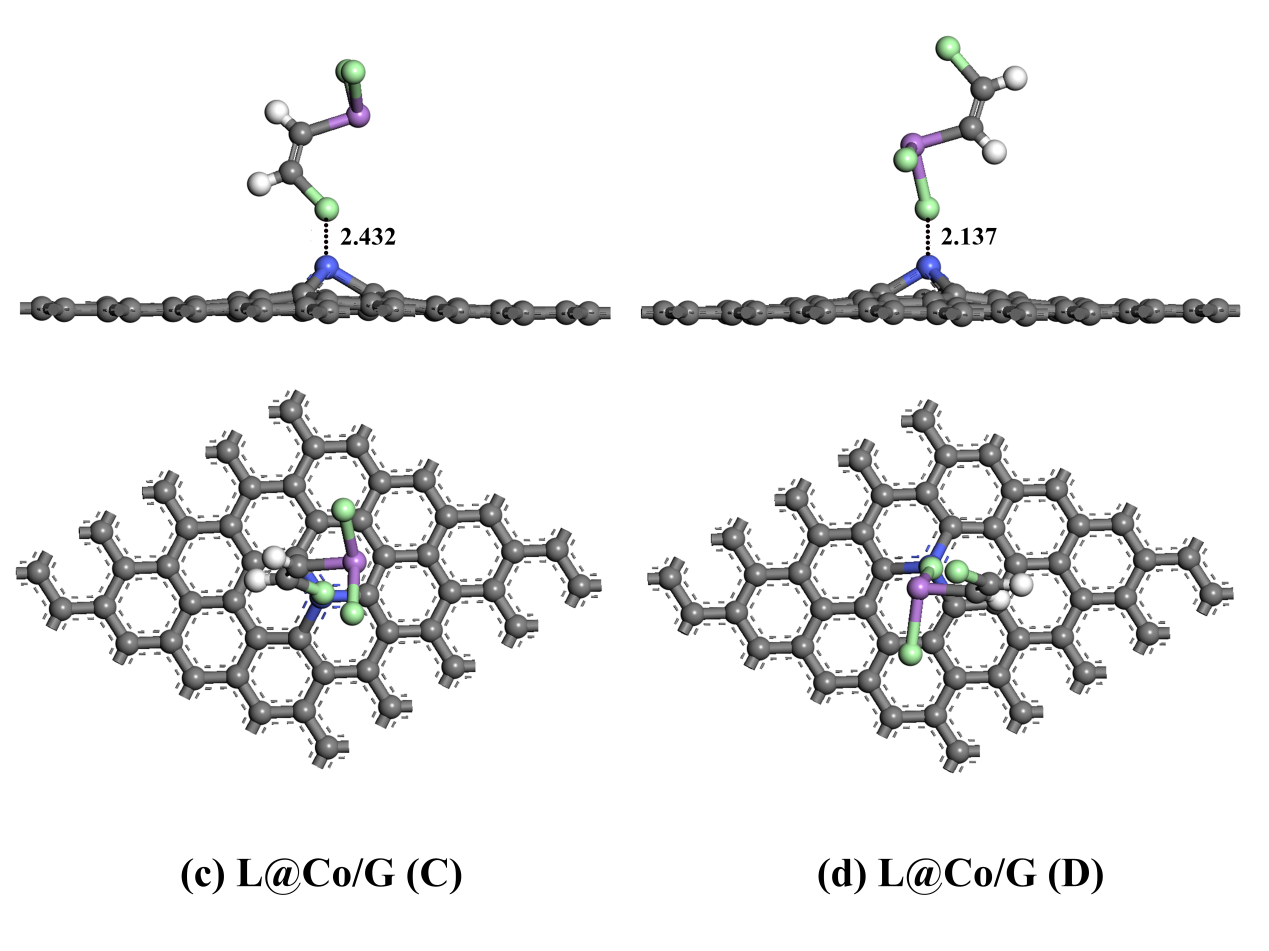

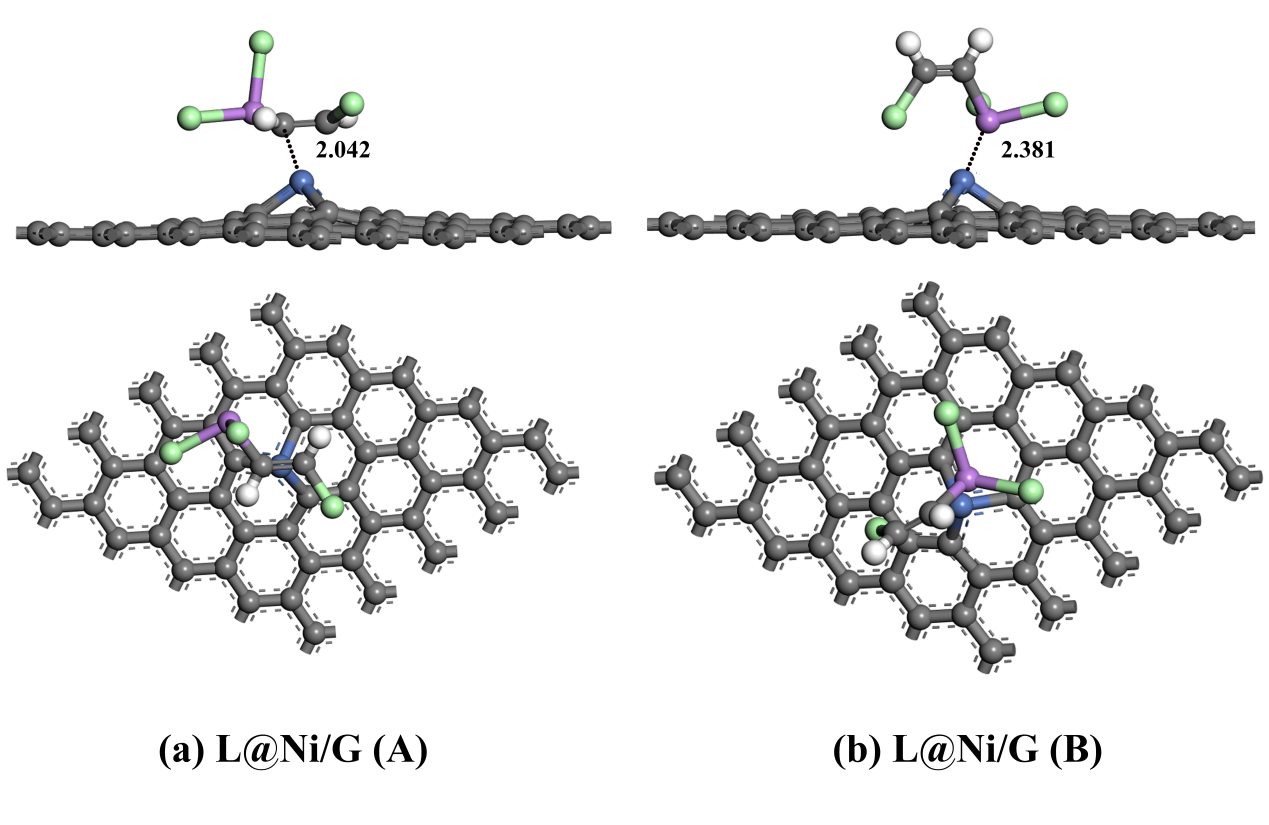

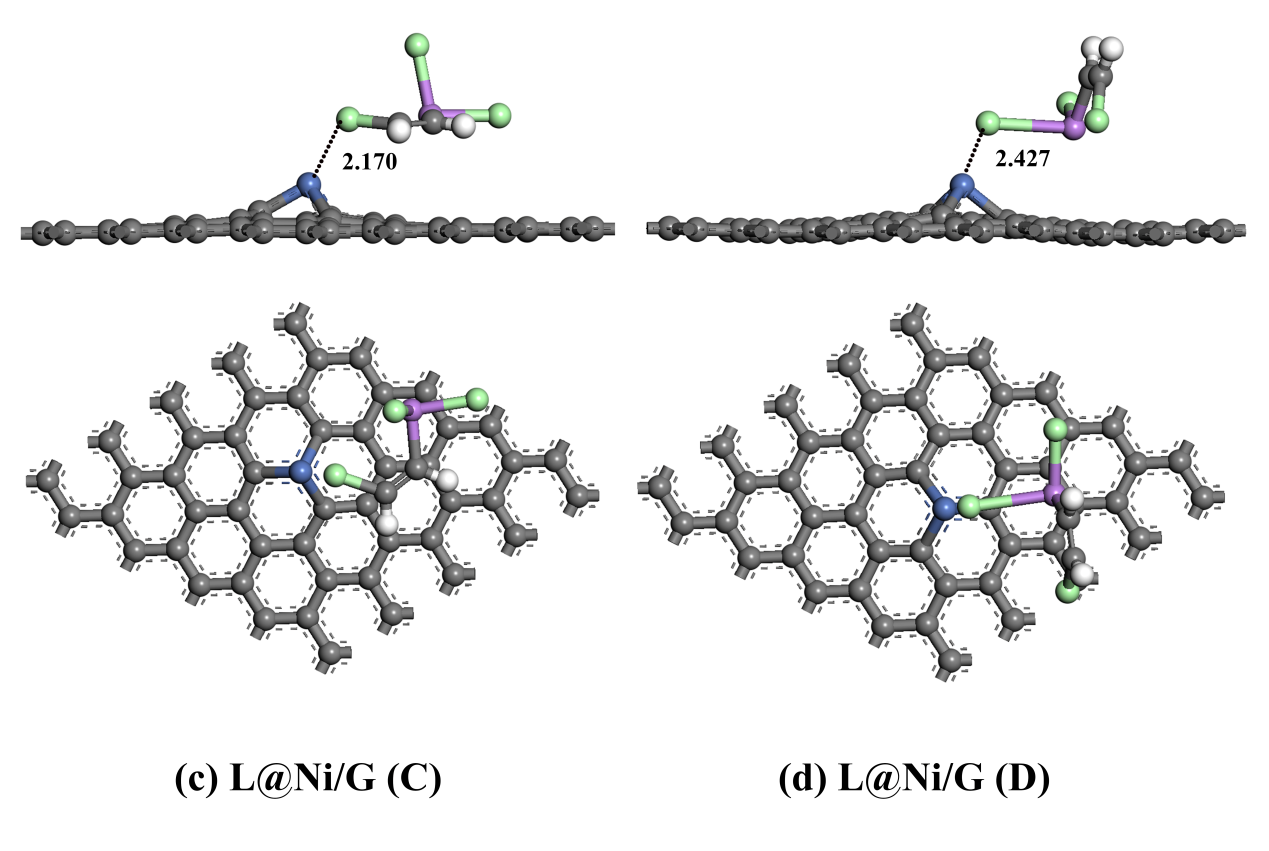

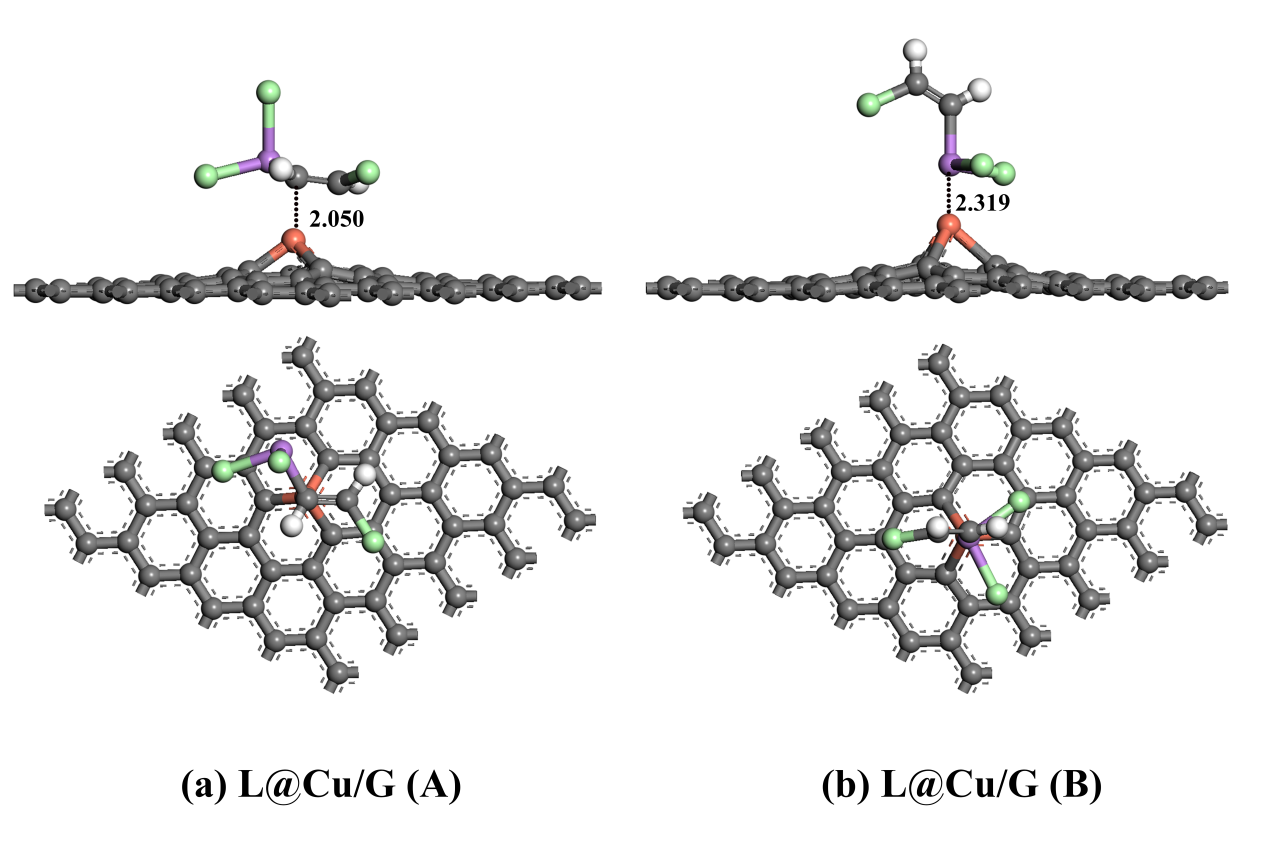

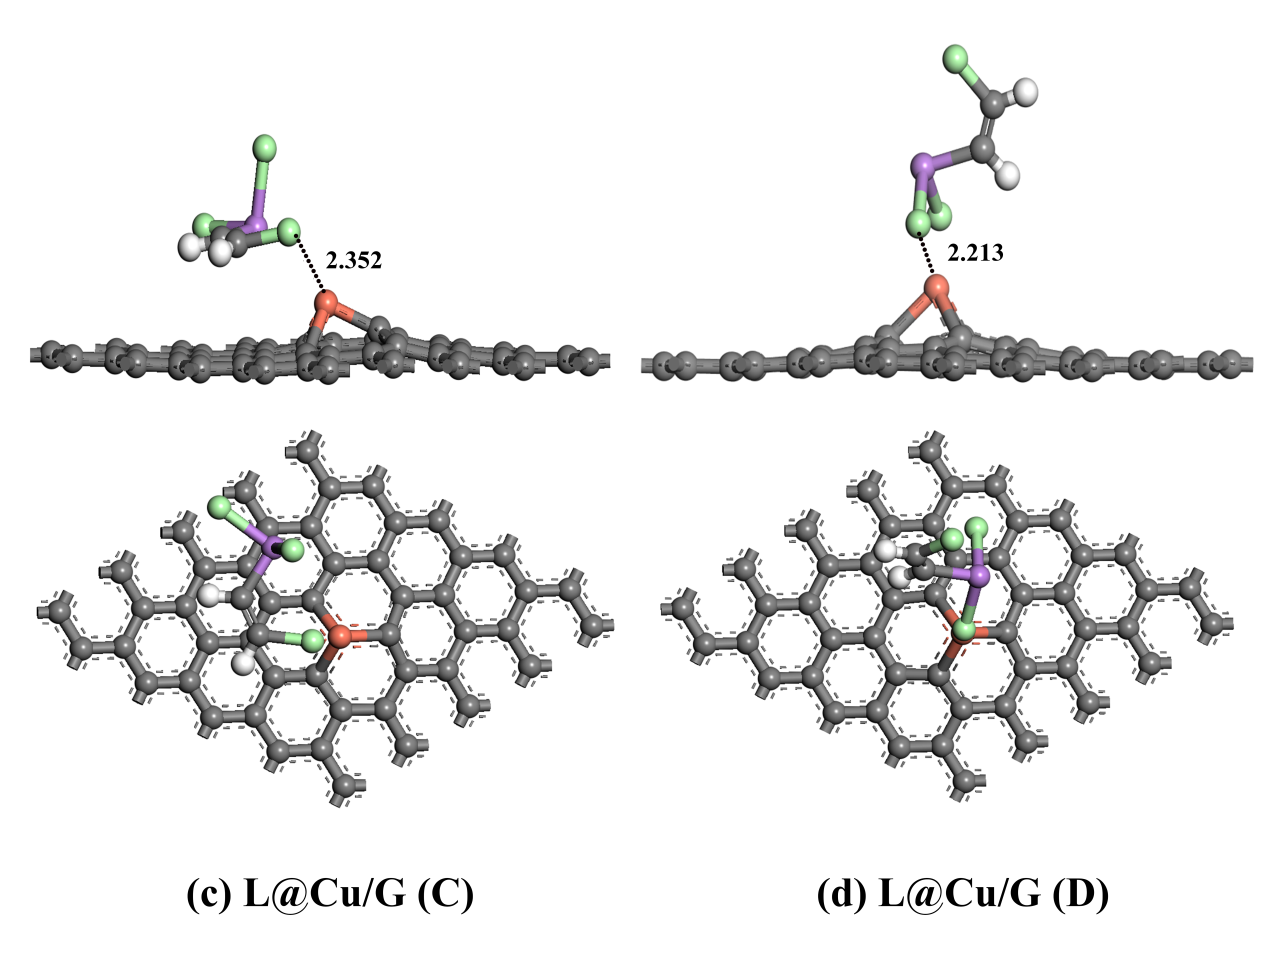

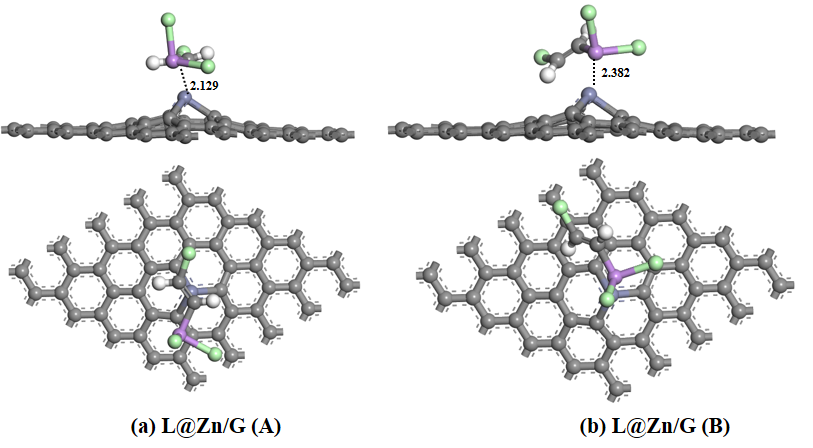

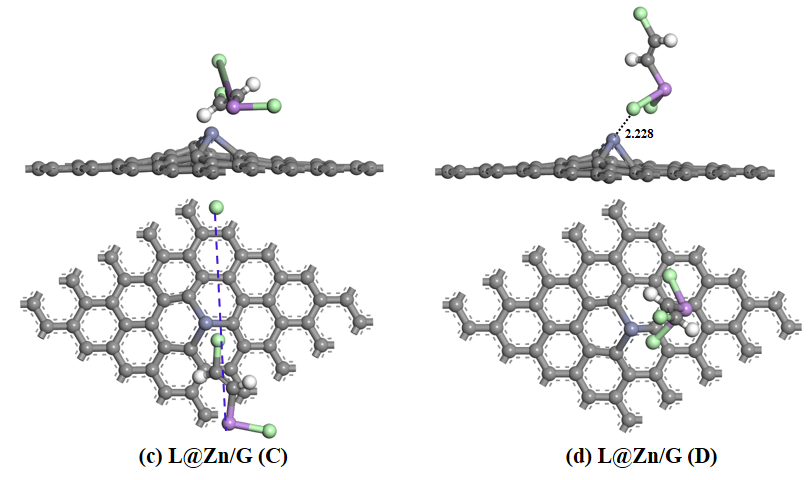


**Figure S1** The optimized structures of the lewisite molecule adsorption on TM/G sheet with different orientation.

**Table S1**The adsorption configuration and distance between lewisite and TM/G sheet, along with the adsorption energies (Eads) of lewisite on the TM/G. ( “/”represents the lewisite decomposition after adsorption）

| Species | Initial configurations | The distanceTM-L  (Å) | Final configurations | Eads (eV) |
| --- | --- | --- | --- | --- |
| L@Sc/G | A | 2.626 | A | -1.216 |
|  | B | / | / | / |
|  | C | / | / | / |
|  | D | / | / | / |
| L@Ti/G | A | 2.438 | A | -1.315 |
|  | B | / | / | / |
|  | C | 2.523 | A | -1.328 |
|  | D | / | / | / |
| L@V/G | A | 2.185 | A | -1.826 |
|  | B | / | / | / |
|  | C | 2.455 | C | -0.789 |
|  | D | / | / | / |
| L@Cr/G | A | 2.098 | A | -2.179 |
|  | B | 2.486 | B | -1.438 |
|  | C | 2.106 | A | -2.213 |
|  | D | 2.232 | D | -1.689 |
| L@Mn/G | A | 2.082 | A | -2.362 |
|  | B | 2.387 | B | -1.592 |
|  | C | 2.066 | A | -2.298 |
|  | D | 2.205 | D | -2.039 |
| L@Fe/G | A | 2.055 | A | -2.024 |
|  | B | 2.439 | B | -1.587 |
|  | C | 2.346 | C | -1.356 |
|  | D | 2.181 | D | -1.913 |
| L@Co/G | A | 2.032 | A | -1.479 |
|  | B | 2.398 | B | -1.273 |
|  | C | 2.432 | C | -1.078 |
|  | D | 2.137 | D | -1.639 |
| L@Ni/G | A | 2.042 | A | -1.451 |
|  | B | 2.381 | B | -1.344 |
|  | C | 2.427 | C | -0.996 |
|  | D | 2.170 | D | -1.326 |
| L@Cu/G | A | 2.050 | A | -1.652 |
|  | B | 2.319 | B | -1.293 |
|  | C | 2.352 | C | -1.103 |
|  | D | 2.213 | D | -1.345 |
| L@Zn/G | A | 2.129 | A | -1.224 |
|  | B | 2.382 | B | -1.297 |
|  | C | / | / | / |
|  | D | 2.228 | D | -1.051 |


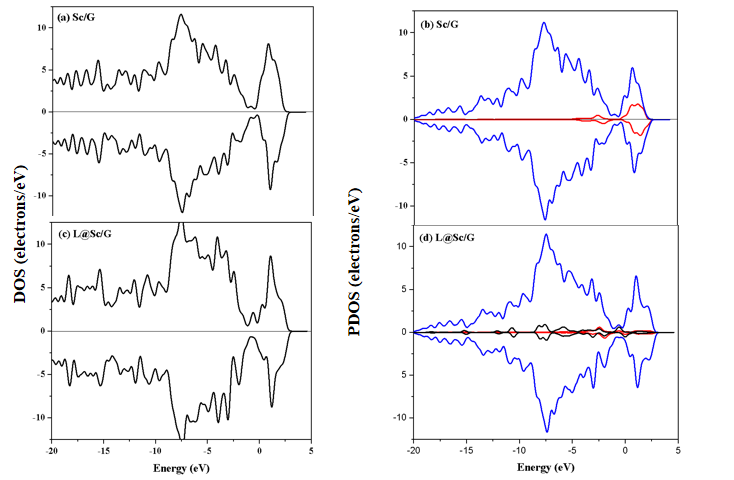


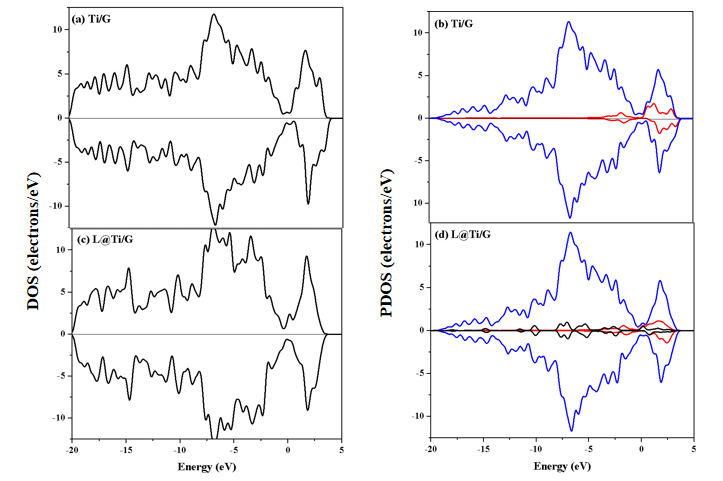


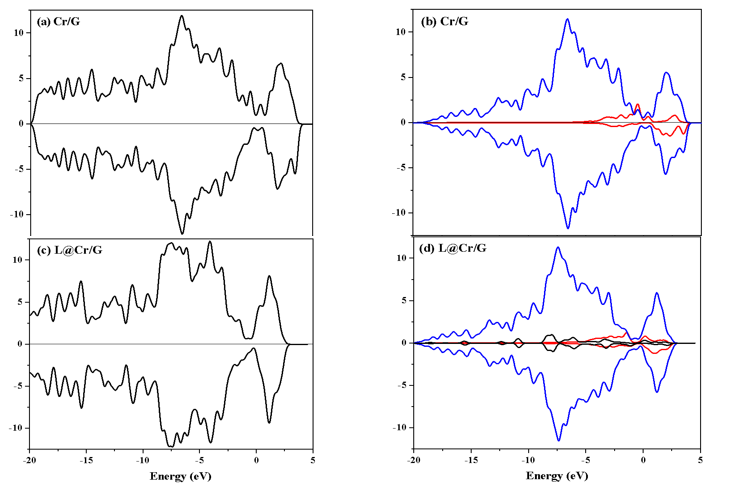

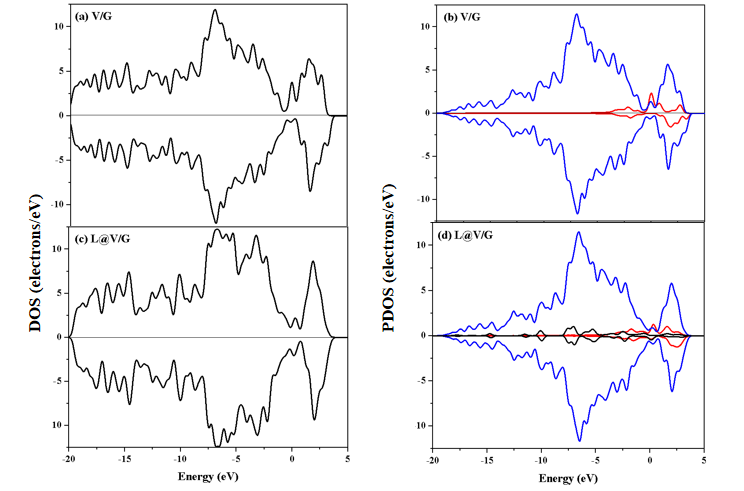


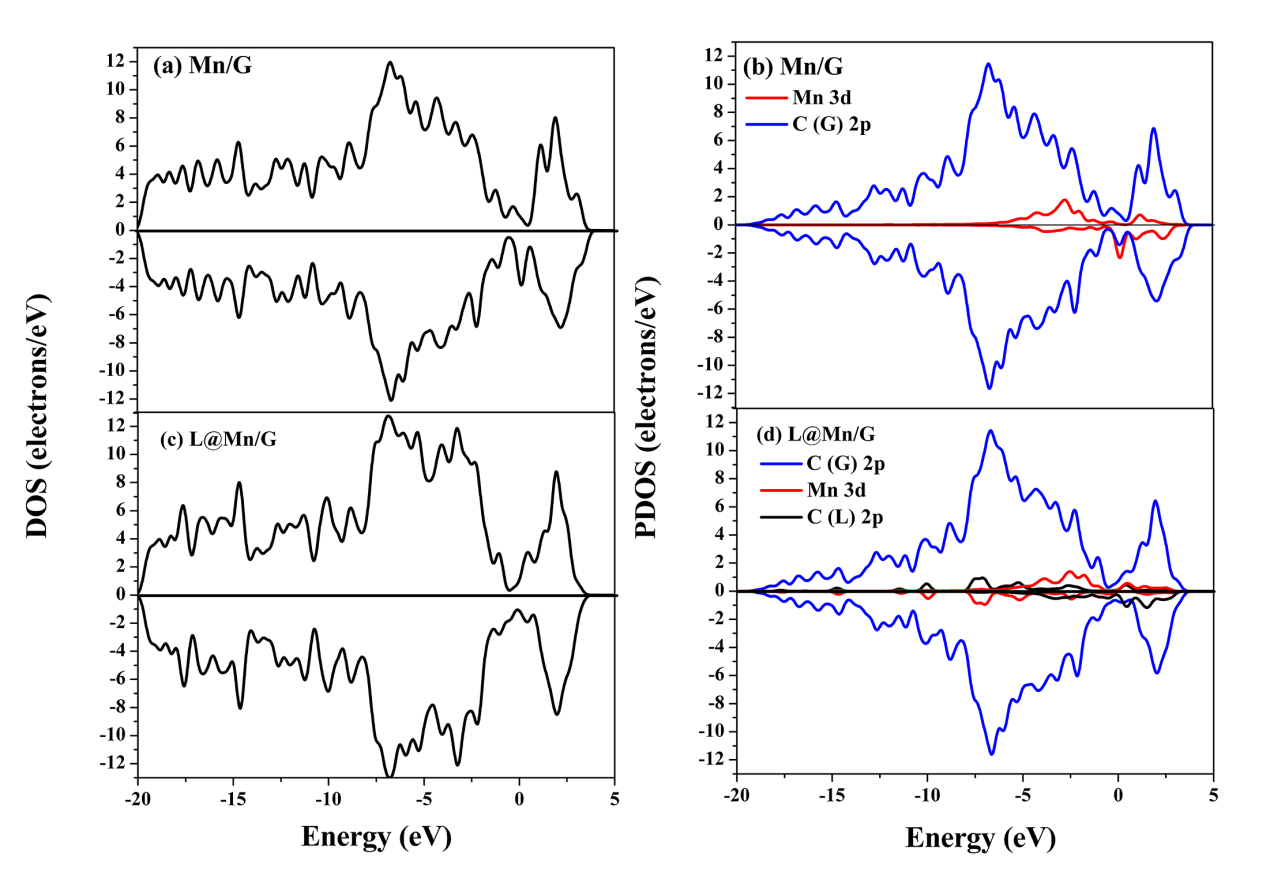


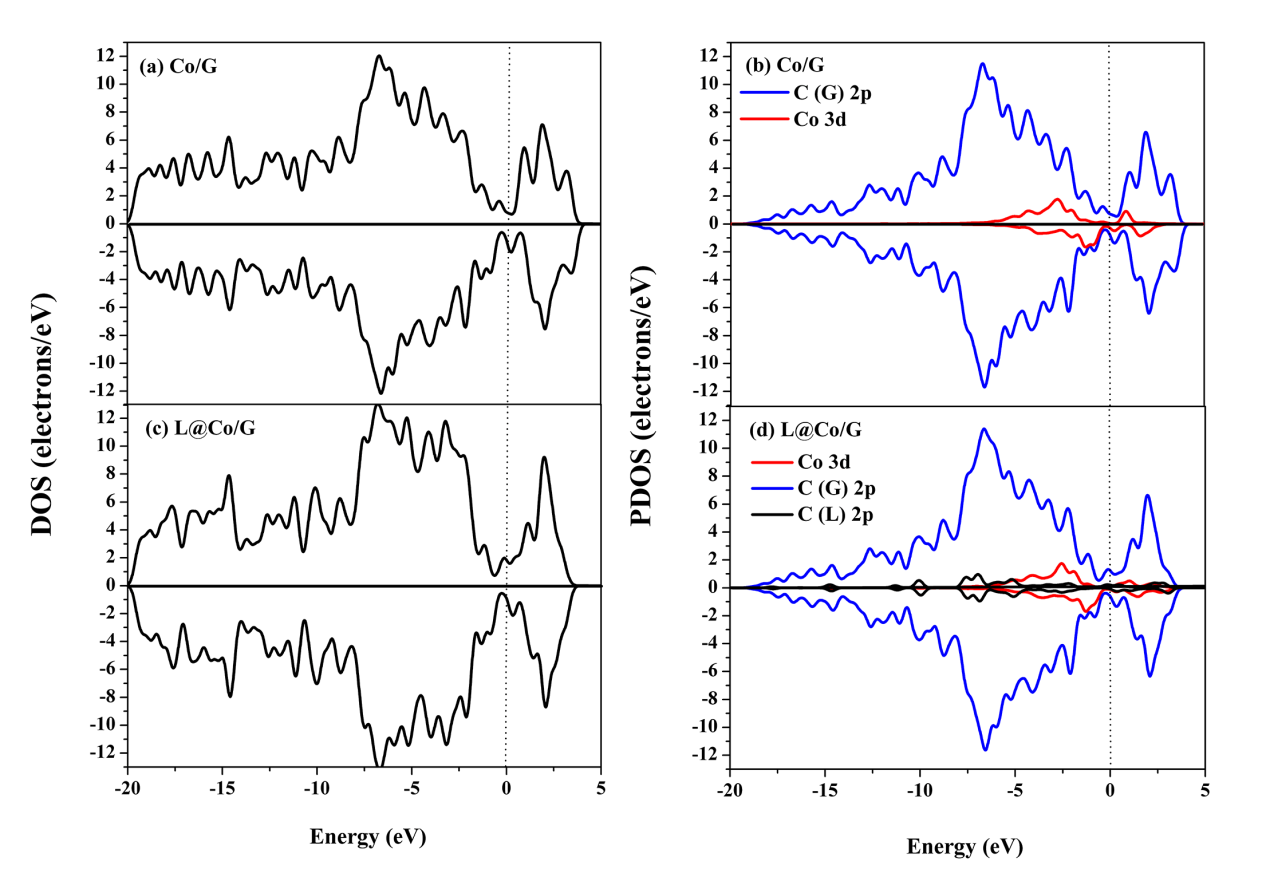


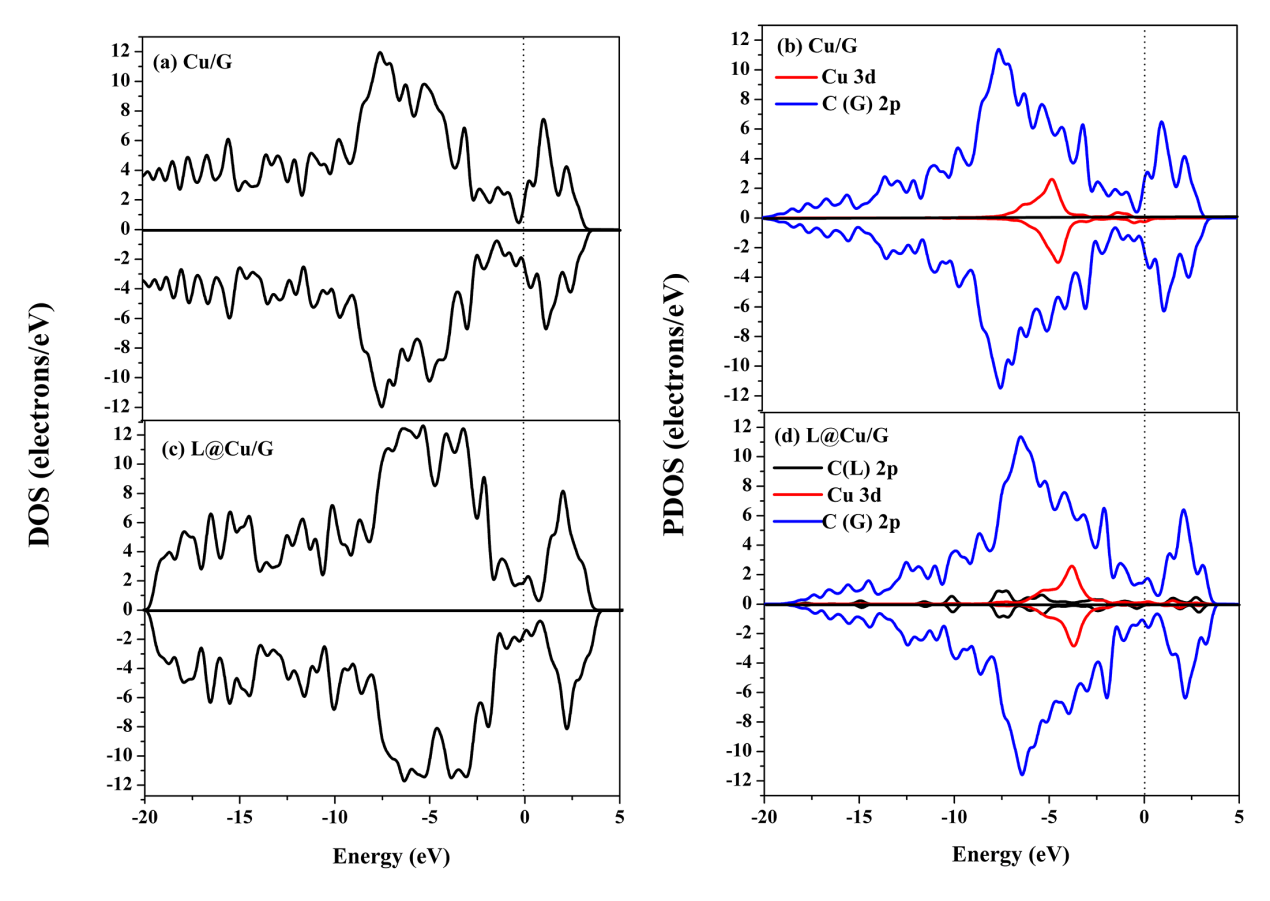

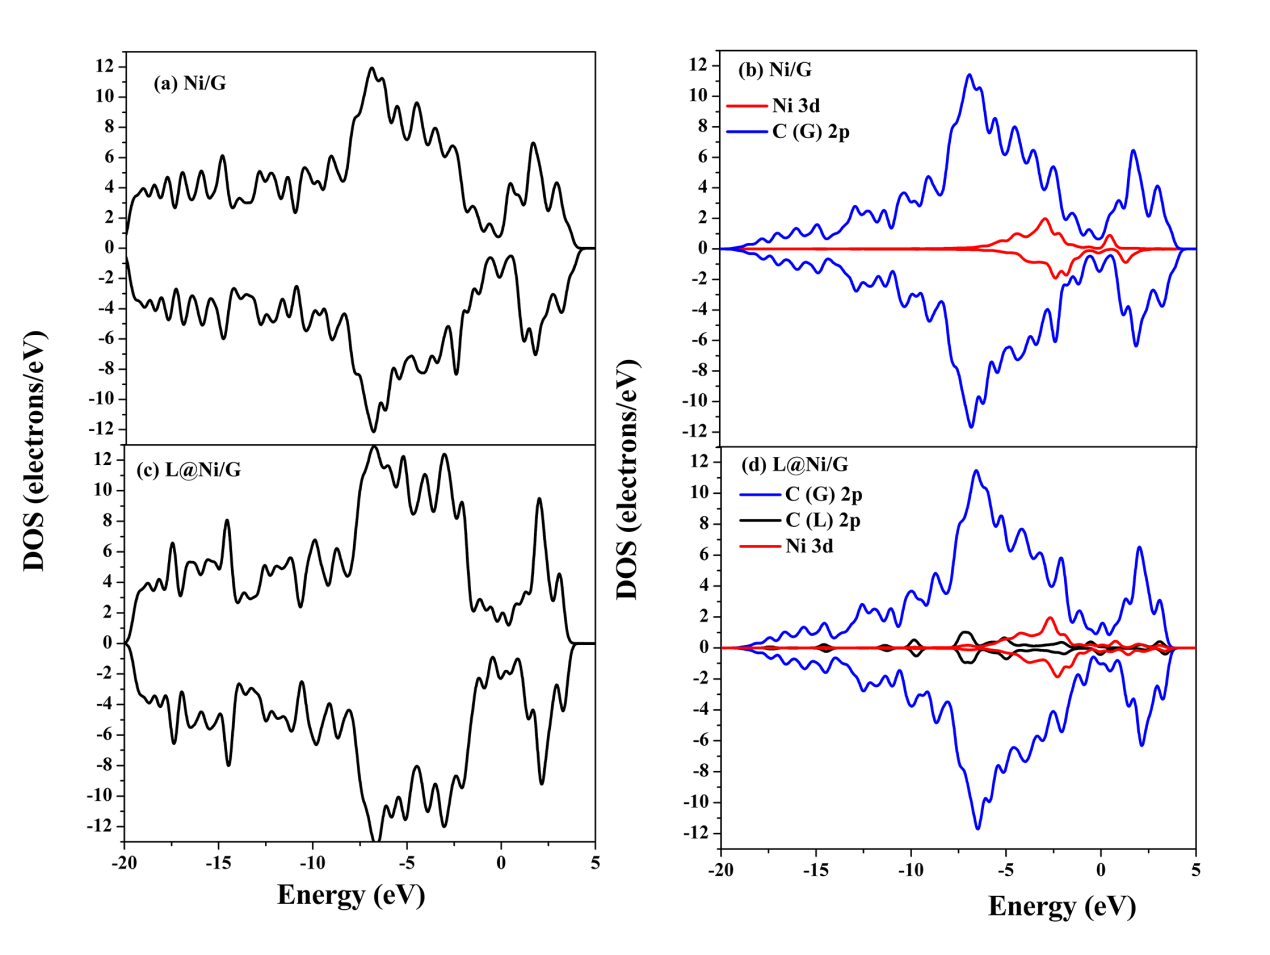


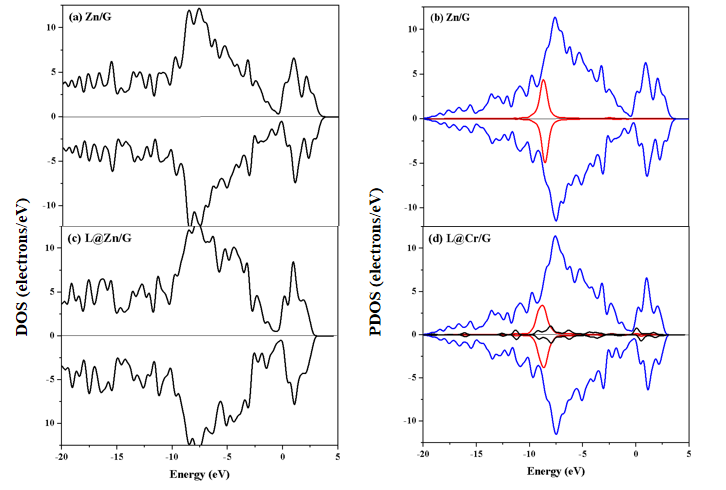


**Figure S2** Total and partial DOS for TM/G sheets and L@TM/G. (a) total DOS of the TM/G (b) partial DOS of TM/G (c) the total DOS of L@TM/G (d) partial DOS of L@TM/G. Note: C(G) and C(L) represent the carbon atom in graphene sheet and lewisite, respectively.


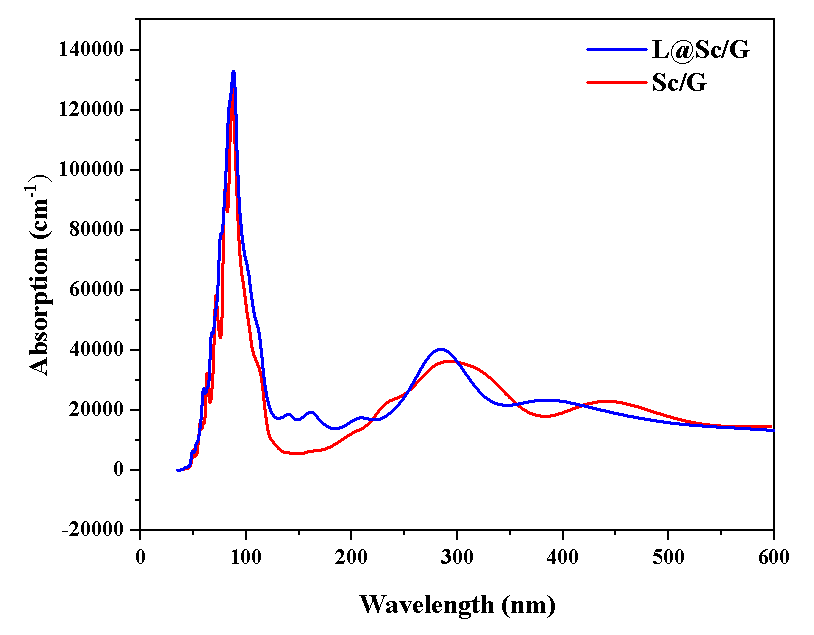


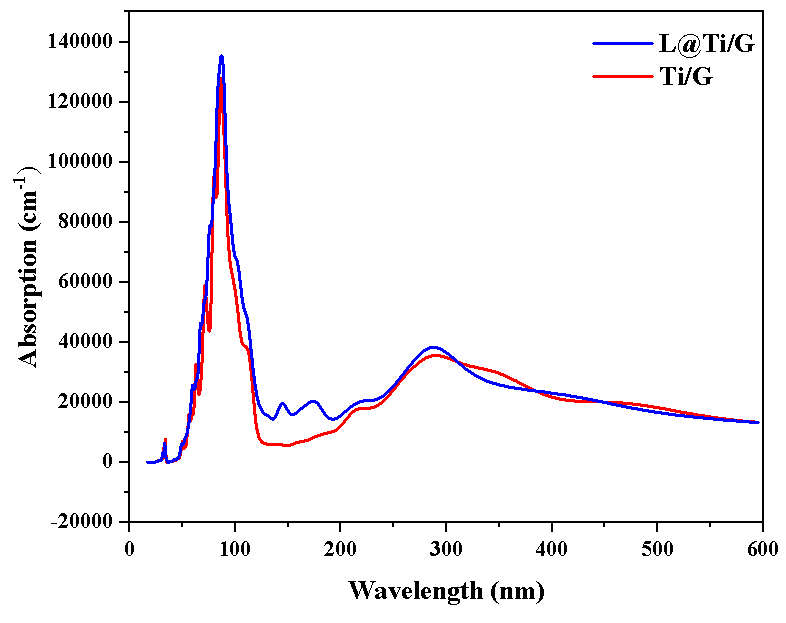

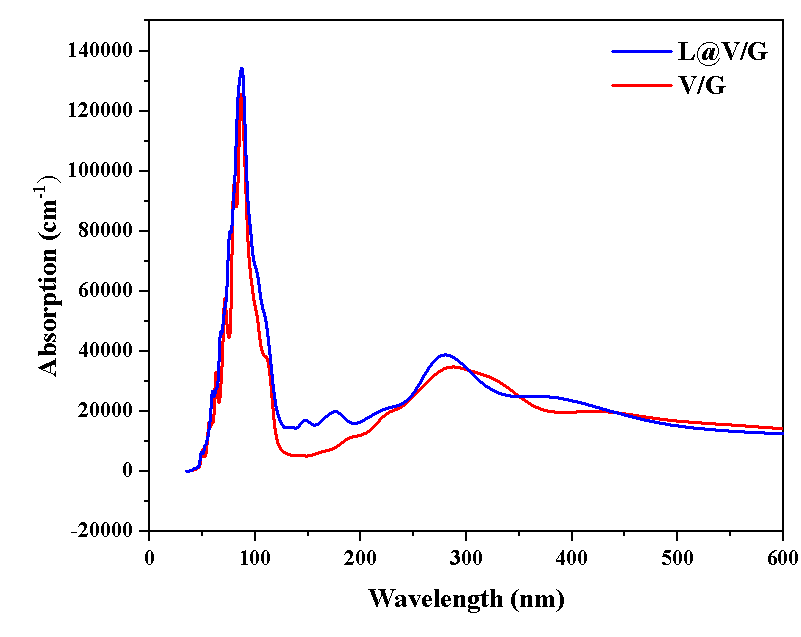


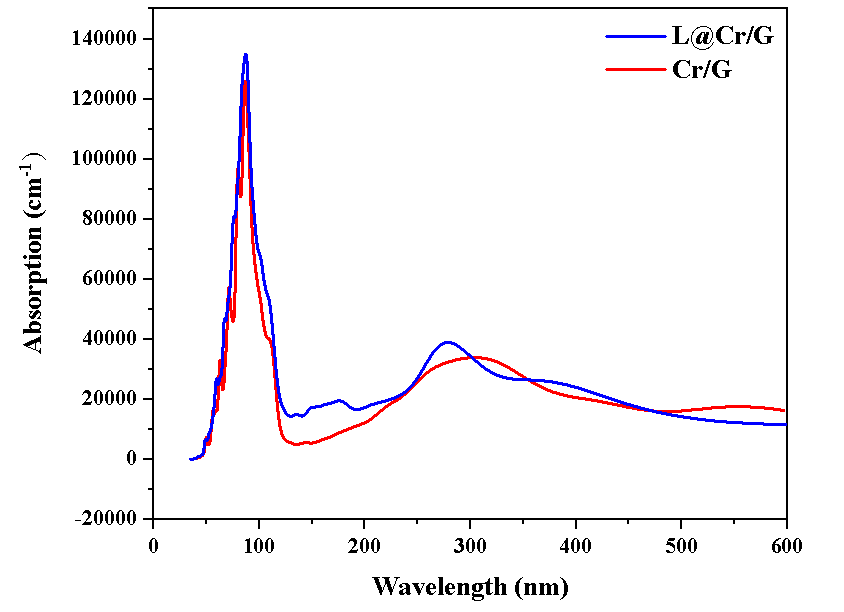


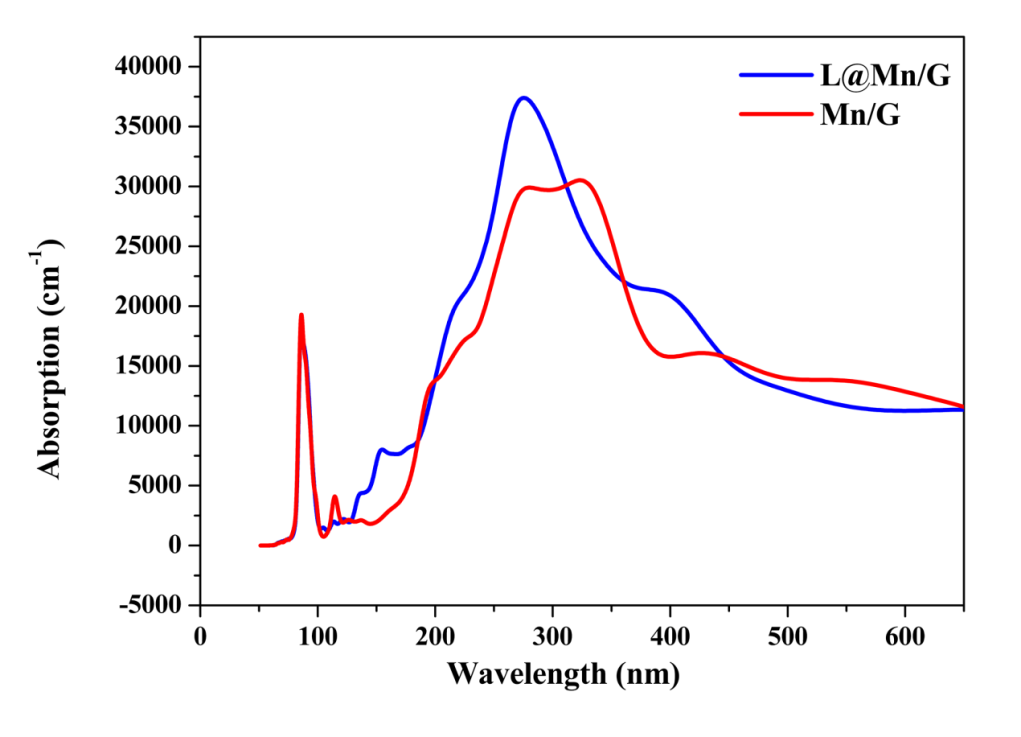


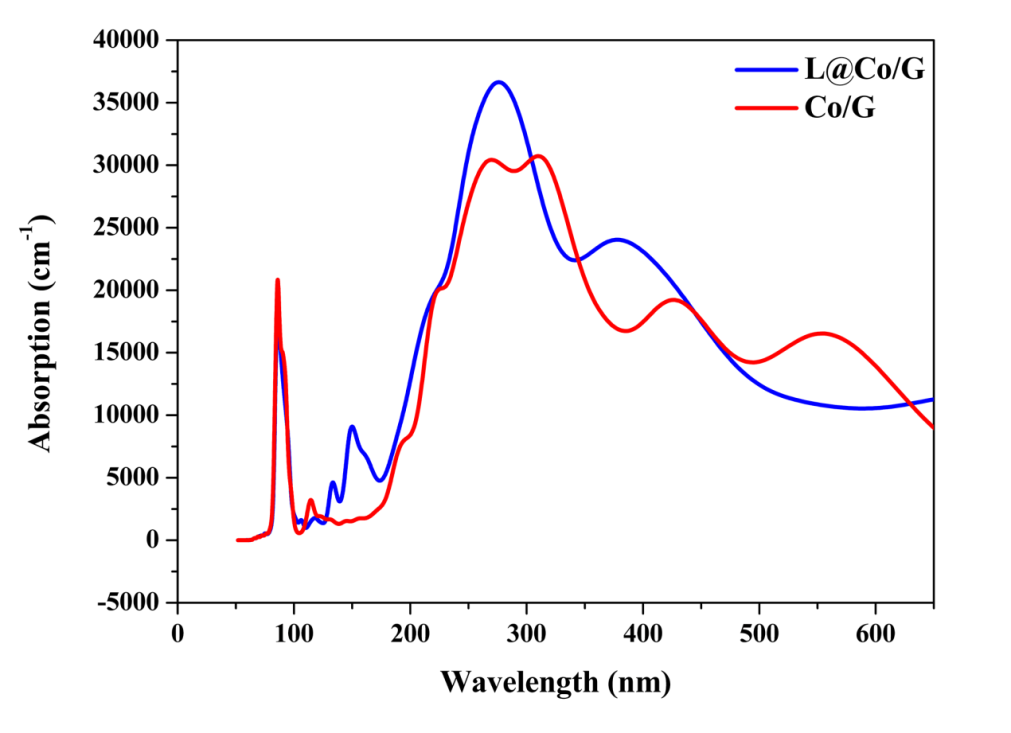


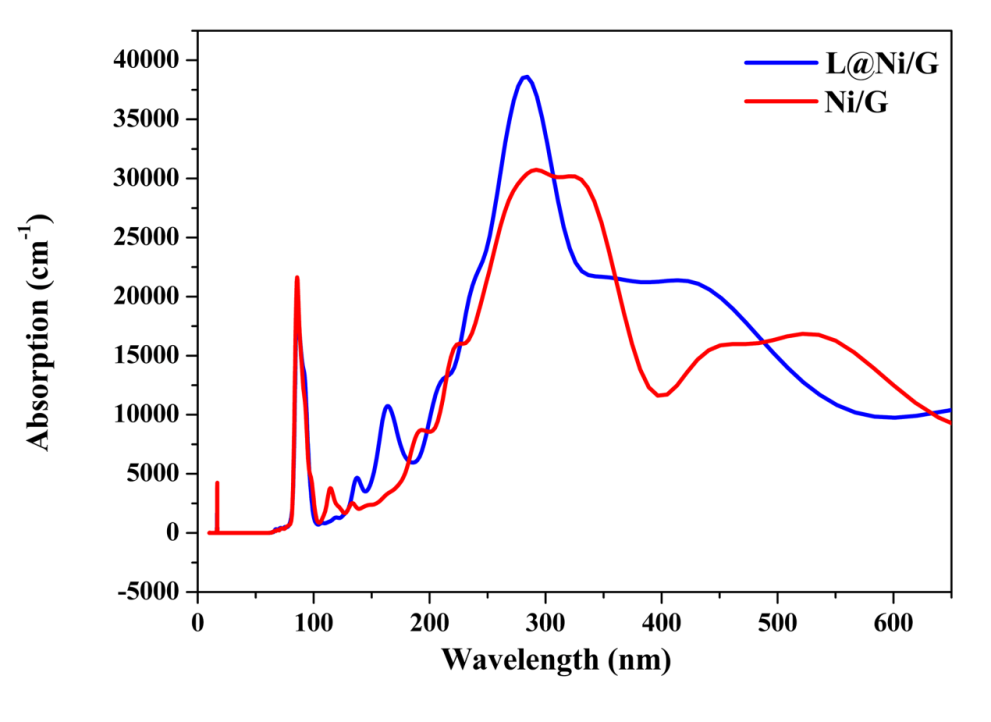


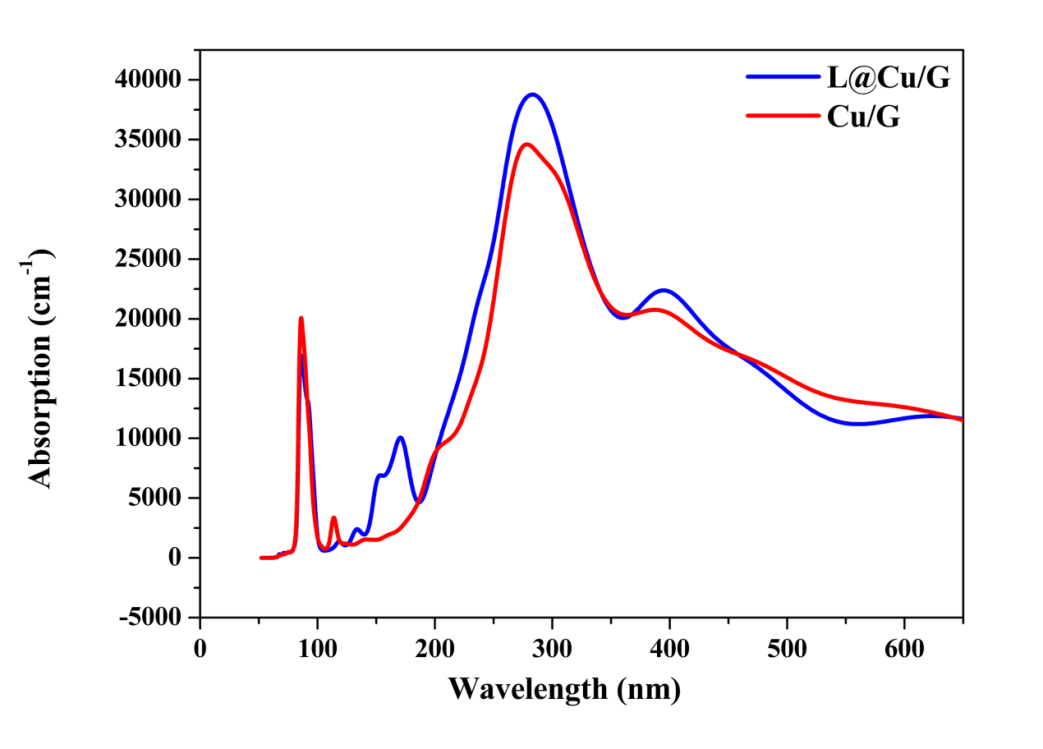


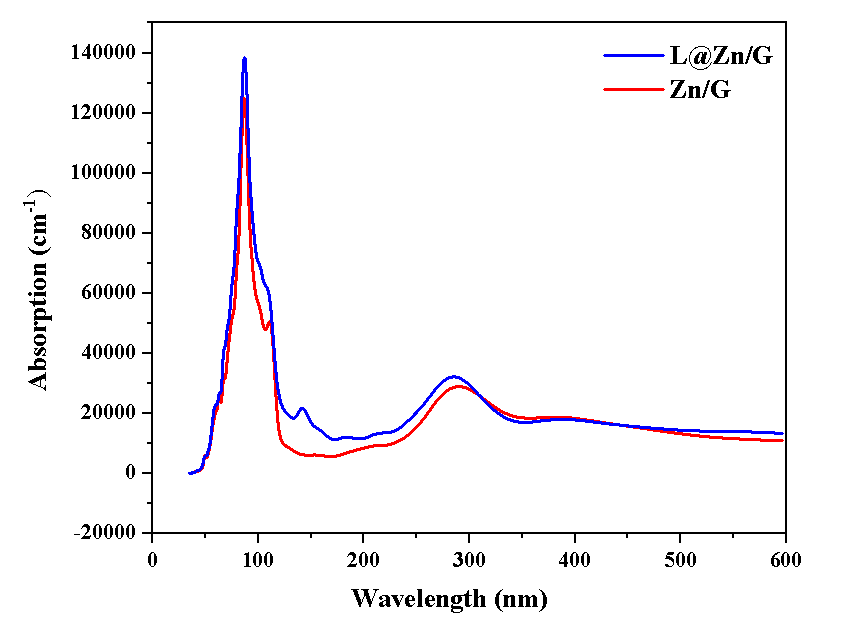


**Figure S3** UV absorption spectra of TM/G substrates and L@TM/G
